# Supplementary material
Source: publisher figshare collection journal article supplement (https://karger.figshare.com/articles/dataset/_/3839706)
Supplement: Supplementary file 1 [file 1]

---

Supplementary Table 2: Quality of life changes during cabazitaxel therapy

---

| EORTC QLQ-C30 |             | Baseline  | Post-<br>treatment | P for change |
|---------------|-------------|-----------|--------------------|--------------|
|               |             | Mean (SD) | best<br>Mean (SD)  |              |
| GLOBAL        | GLOBAL      | 48.80     | 71.42              | 0.015*       |
| HEALTH        | HEALTH      | (26.97)   | (18.54)            |              |
| STATUS/QOL    | STATUS/QOL  |           |                    |              |
| FUNCTION      | Physical    | 54.28     | 61.90              | 0.321        |
| SCALES        | functioning | (29.42)   | (32.59)            |              |
|               | Role        | 76.19     | 71.43              | 0.673        |
|               | functioning | (26.97)   | (39.34)            |              |
|               | Cognitive   | 64.28     | 80.95              | 0.216        |
|               | functioning | (27.93)   | (22.41)            |              |
|               | Social      | 73.80     | 80.95              | 0.629        |
|               | functioning | (30.21)   | (27.93)            |              |
|               | Emotional   | 60.71     | 80.95              | 0.170        |
|               | functioning | (30.69)   | (24.86)            |              |
| SYMPTOM/ITEM  | Fatigue     | 45.23     | 42.85              | 0.853        |
| SCALES        |             | (31.49)   | (35.81)            |              |
|               | Nausea      | 28.57     | 16.66              | 0.140        |
|               | Vomiting    | (24.93)   | (30.42)            |              |
|               | Pain        | 47.61     | 35.71              | 0.334        |

|                            |                  |                    |              |
|----------------------------|------------------|--------------------|--------------|
|                            | (36.55)          | (45.57)            |              |
| Dyspnoea                   | 9.52 (16.26)     | 9.52 (16.26)       | 1            |
| Insomnia                   | 47.61(37.79)     | 28.57<br>(35.63)   | 0.321        |
| Appetite                   | 47.61<br>(42.41) | 28.57<br>(40.49)   | 0.231        |
| Constipation               | 71.42<br>(40.49) | 19.0(37.79)        | 0.017*       |
| Diarrhoea                  | 23.80(37.08)     | 14.28<br>(26.22)   | 0.172        |
| Financial<br>difficulties  | 33.33<br>(47.14) | 14.29<br>(37.79)   | 0.231        |
| <hr/>                      |                  |                    |              |
| EORTC QLQ-PR25             | Baseline         | Post-<br>treatment | P for change |
|                            | Mean (SD)        | best<br>Mean (SD)  |              |
| <hr/>                      |                  |                    |              |
| 'Urinary symptoms          | 38.69 (19.5)     | 20.23<br>(24.58)   | 0.247        |
| Bowel symptoms             | 14.28<br>(16.46) | 5.95 (7.92)        | 0.234        |
| Treatment related symptoms | 23.01<br>(17.39) | 7.93 (12.77)       | 0.170        |
| Sex Interest               | 4.76 (12.59)     | 4.76 (12.59)       | 1.0          |
| <hr/>                      |                  |                    |              |

\*p<0.05, significant

Abbreviations: QOL – Quality of life; EORTC QLQ-PR25 - European Organisation for Research and Treatment of Cancer QOL Questionnaire-Prostate Module; EORTC QLQ-C30 - European Organisation for Research and Treatment of Cancer (EORTC) core QOLquestionnaire

---
