# Supplementary material
Source: publisher figshare collection journal article supplement (https://karger.figshare.com/articles/dataset/_/3839706)
Supplement: Supplementary file 2 [file 1]

**Supplementary figure 1: PSA Responses**

**MAXIMAL PSA RESPONSE (% from baseline)**

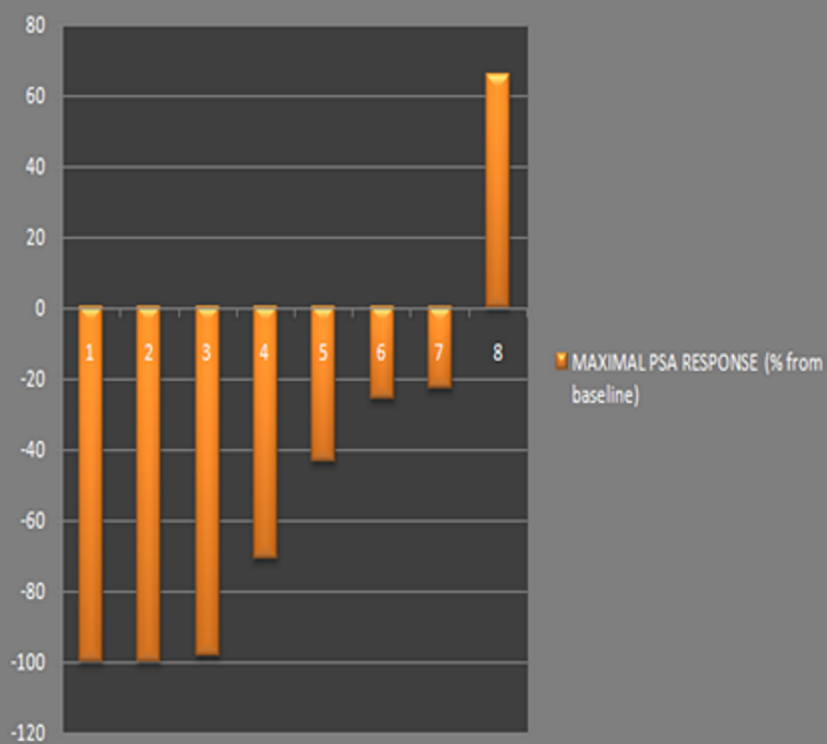

**Maximal PSA responses: Maximum decline in PSA that occurs at any point after treatment.**  
Maximal PSA response rate was  $4/8 = 50\%$

**PSA % change from baseline at ~12 weeks**

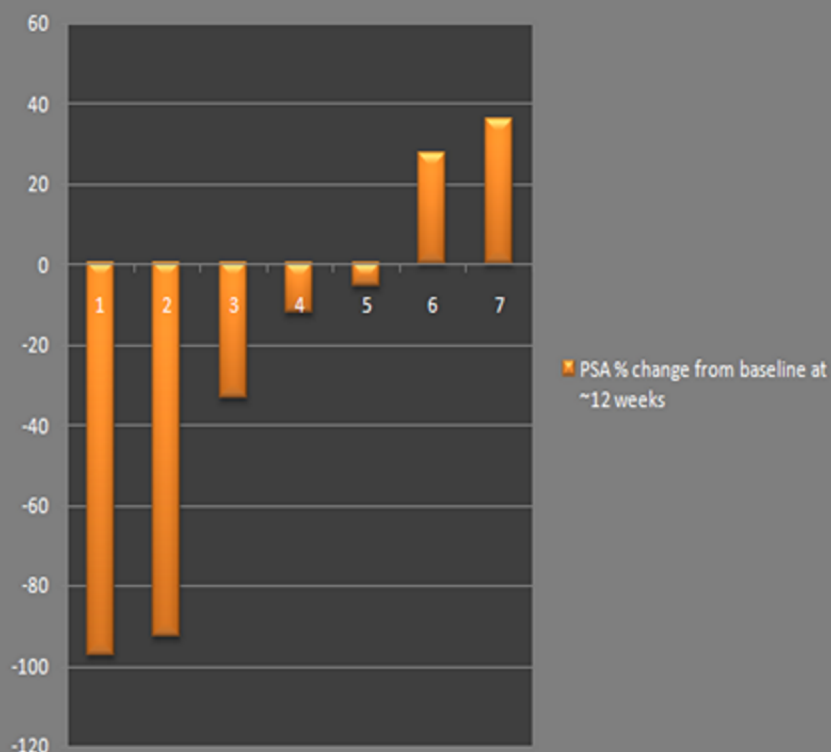

**PSA response at ~ 12 weeks**

PSA response rate at ~ 12 weeks treatment was  $2/7 = 29\%$ .
